# Supplementary material for: Archaeological soil from Roman occupational layers can be differentiated by microbial and chemical signatures
Source: Frontiers journal article supplement (doi:10.3389/fsoil.2023.1129040), 2023-02-14

**Supplementary data for:-**

**Archaeological soil from Roman occupational layers can be differentiated by microbial and chemical signatures**

Gillian Taylor1,2,, Rhys Williams1,2, Hrafnhildur Helga Halldórsdóttir1,2,Ashleigh Carter1,2,Andrew Birley3, Alexander Meyer4, Caroline Hayley Orr1,2*

1School of Health and Life Sciences, Teesside University, Middlesbrough, TS1 3BX, UK. 2National Horizons Centre, Teesside University, Darlington, DL1 1HG, UK

3Vindolanda, Bardon Mill, Hexham, Northumberland NE47 7JN, UK

4Faculty of Arts and Humanities, Classics Department, University of Western Ontario, 1151 Richmond St., London, Ontario, N6A 5B8, Canada

Correspondence*: c.orr@tees.ac.uk

**Figure 1 – Headspace-GCMS showing pinene detected in layer 1**

**Figure 2. LEfSe analysis showing microbes at varied taxonomic ranks indicative of different soil types**


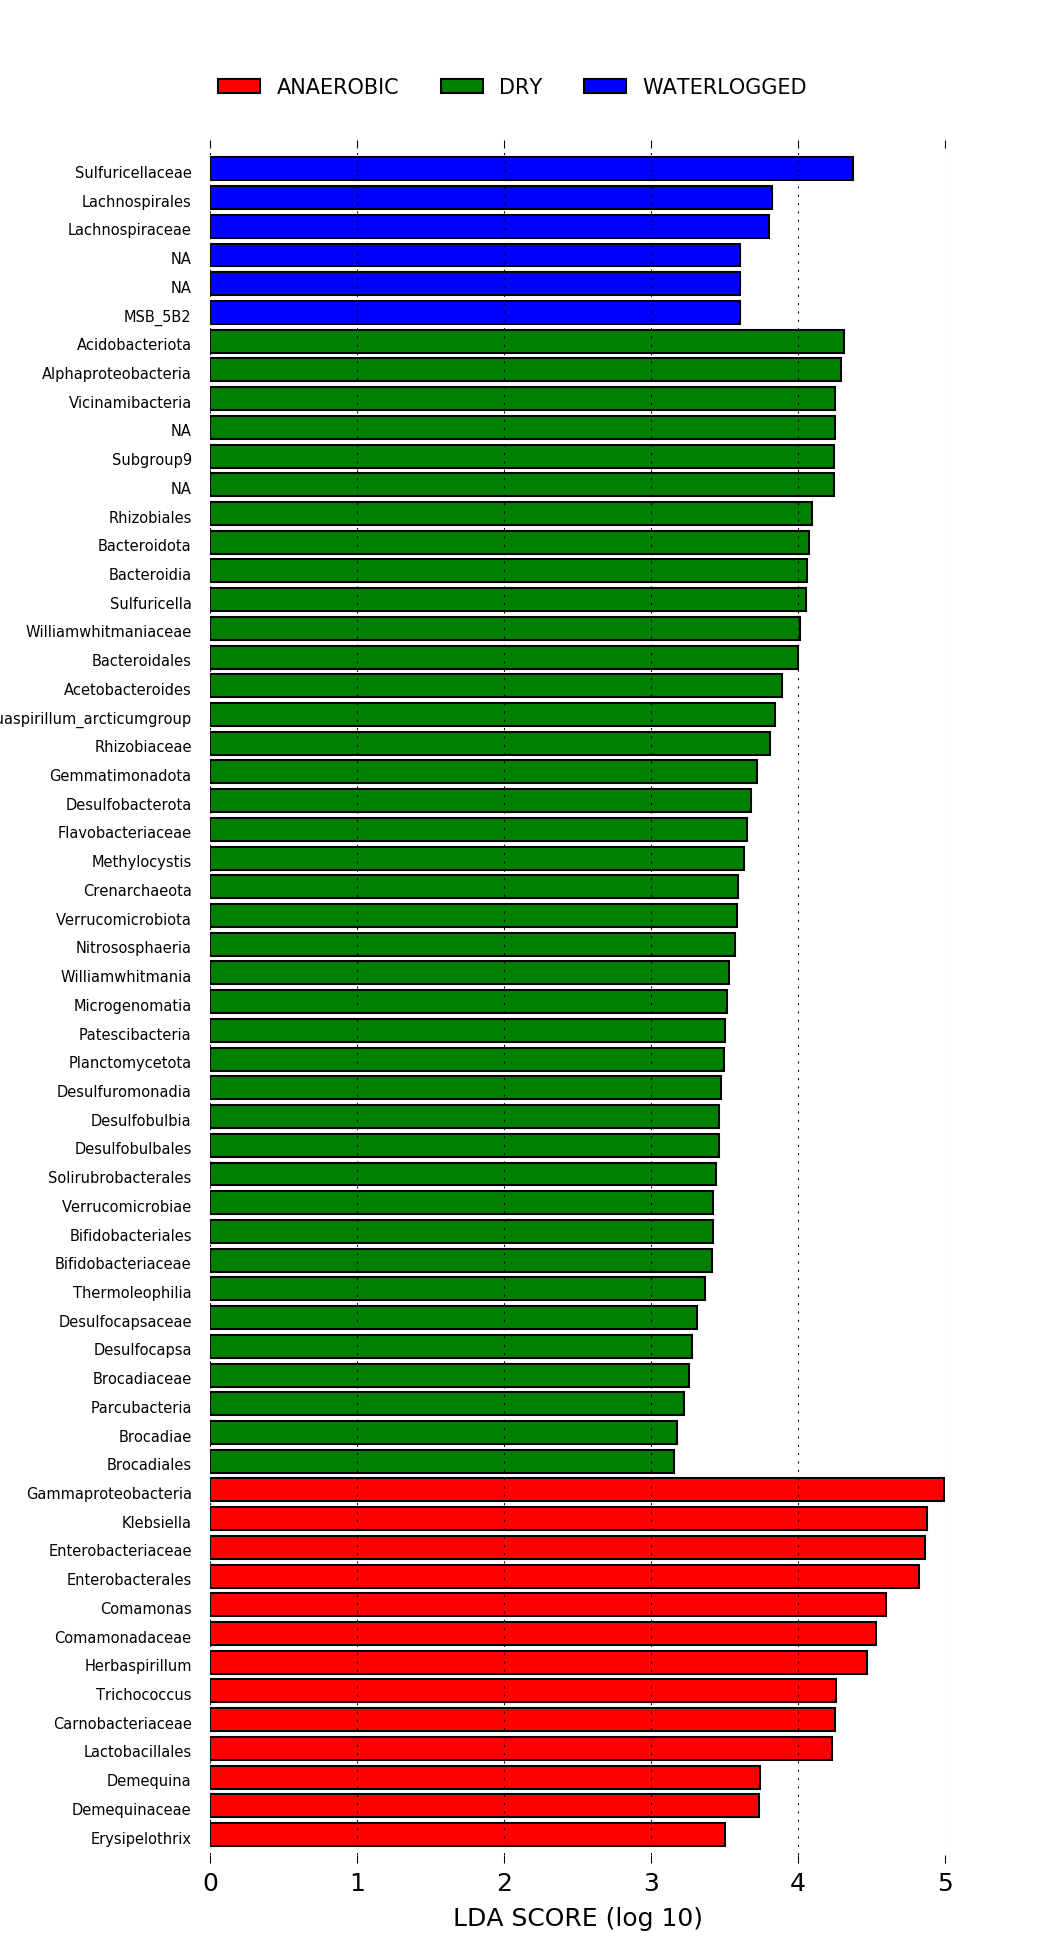

Supplement: Data_Sheet_1.docx [file Data_Sheet_1.docx]
